# Supplementary material for: Variation in use and outcomes related to midline catheters: results from a multicentre pilot study
Source: PubMed Central journal article supplement — BMJ Qual Saf. 2019 Mar 18;28(9):714–20. doi: 10.1136/bmjqs-2018-008554 (PMC6860966; doi:10.1136/bmjqs-2018-008554), 2019-03-18
Supplement: bmjqs-2018-008554supp001.pdf [file bmjqs-2018-008554supp001.pdf]

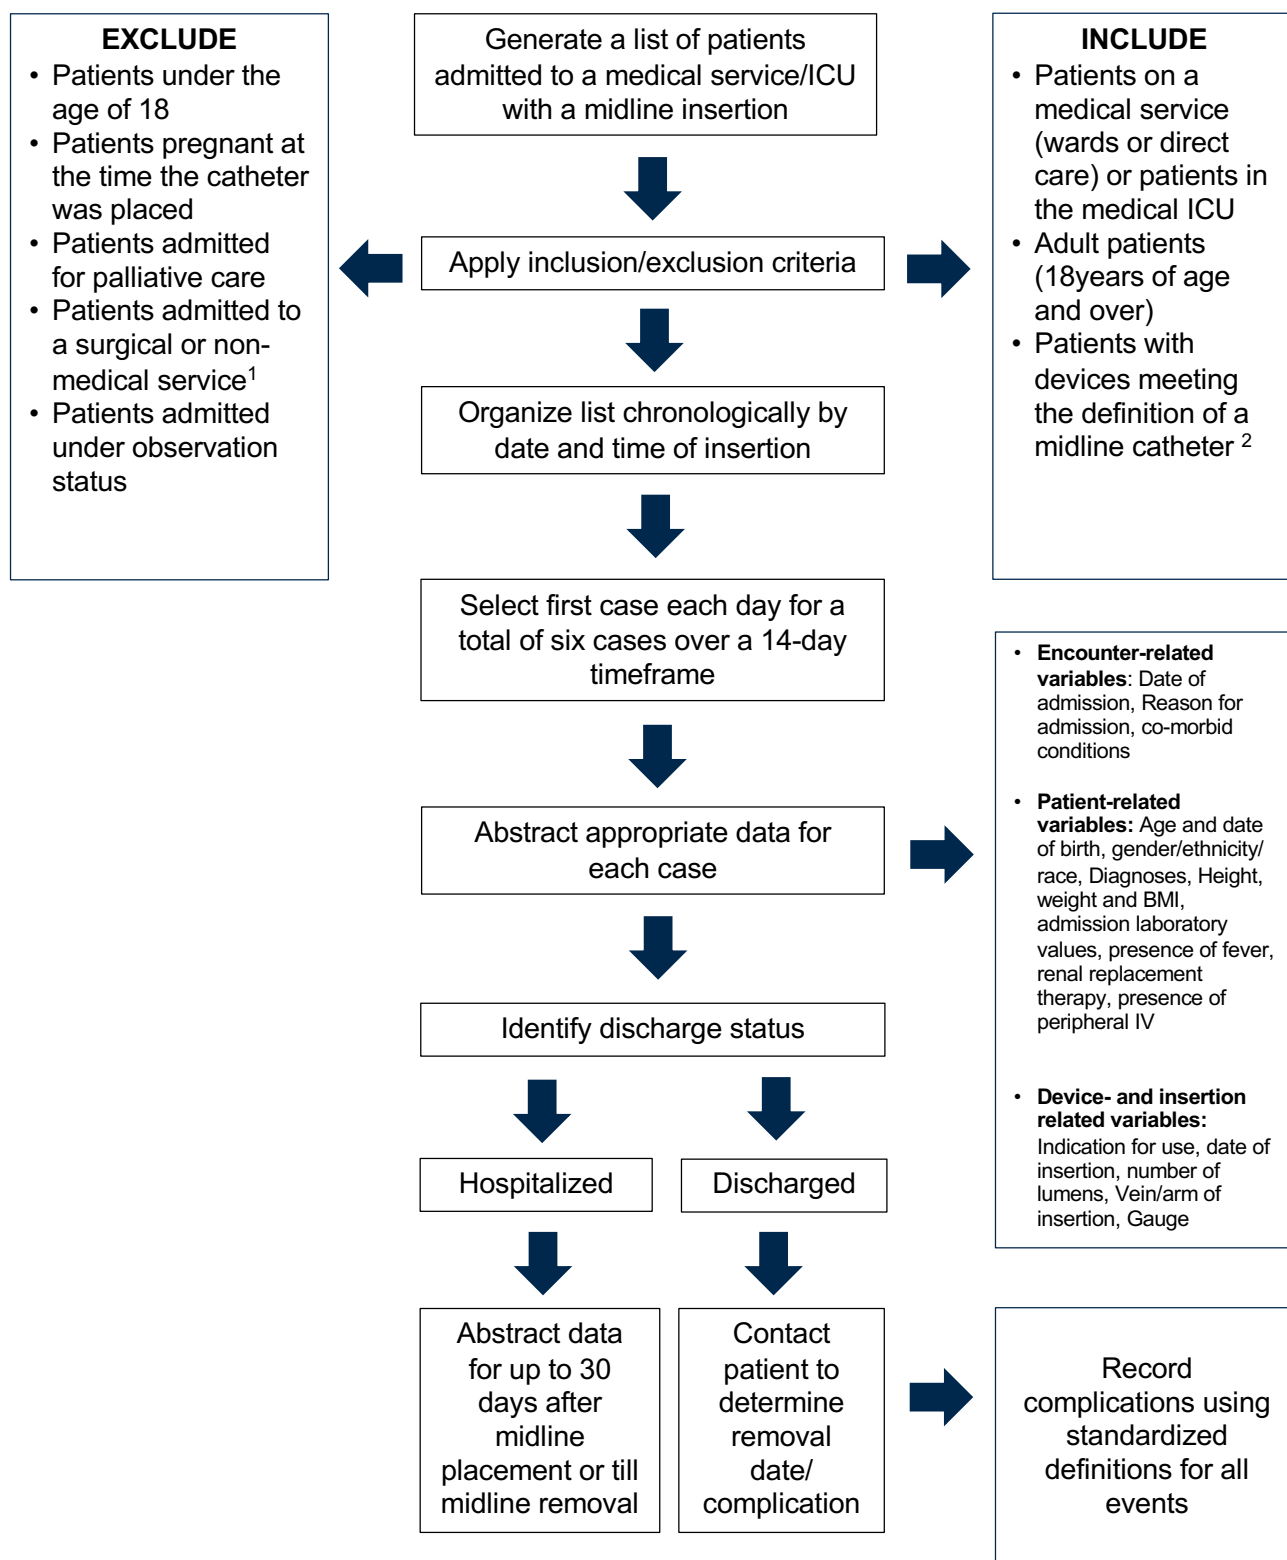

**1 Medical service:** For the midline pilot, medical services include adults with non-critical, non-surgical illnesses and injuries.

**2 Midline catheter:** For the midline pilot, midlines are defined as a vascular access device with the distal tip dwelling in the basilic, cephalic or brachial vein, at or below the level of the axilla and distal to the shoulder.
